# Supplementary material
Source: publisher site journal article supplement (https://www.dovepress.com/article/334840)
Supplement: Supplementary file 1 [file get_supplementary_file.php]

**Supplement 1: Search strategy**

The following databases and reviews were searched to analyze enriched enrolment withdrawal non-malignant pain trials.

1. Pubmed
2. PsychInfo
3. Scopus
4. Reviews
5. **PubMed search**

PubMed search on 07-06-2020:

(withdrawal[All Fields] AND ("random allocation"[MeSH Terms] OR ("random"[All Fields] AND "allocation"[All Fields]) OR "random allocation"[All Fields] OR "randomized"[All Fields]) AND ("pain"[MeSH Terms] OR "pain"[All Fields]) AND ("placebos"[MeSH Terms] OR "placebos"[All Fields] OR "placebo"[All Fields])) AND Clinical Trial[ptyp]

Results: 418

PubMed search on 07-06-2020:

((((("enrich"[All Fields] OR "enriched"[All Fields]) OR "enriches"[All Fields]) OR "enriching"[All Fields]) OR "enrichment"[All Fields]) OR "enrichments"[All Fields]) AND ((((((((((((("enrol"[All Fields] OR "enroled"[All Fields]) OR "enroling"[All Fields]) OR "enroll"[All Fields]) OR "enrolled"[All Fields]) OR "enroller"[All Fields]) OR "enrollers"[All Fields]) OR "enrolling"[All Fields]) OR "enrollment"[All Fields]) OR "enrollments"[All Fields]) OR "enrolls"[All Fields]) OR "enrolment"[All Fields]) OR "enrolments"[All Fields]) OR "enrols"[All Fields]) AND (((("withdraw"[All Fields] OR "withdrawal"[All Fields]) OR "withdrawals"[All Fields]) OR "withdrawing"[All Fields]) OR "withdraws"[All Fields]) AND ("pain"[MeSH Terms] OR "pain"[All Fields])

Results: 52

Pubmed search on 07-06-2020

"withdrawal trial"[All Fields] AND ("pain"[MeSH Terms] OR "pain"[All Fields])

Results: 17

In total 487

1. **PsychInfo search**

Psychinfo search on 07-06-2020

“withdrawal trial” AND pain

Results: 92

1. **Scopus search**

Scopus search on 07-06-2020

“withdrawal trial” AND pain

Results: 31

Total: 610

Duplicates: 56

Without duplicates: 554

Ryan: Showing 5 to 10 of 353 unique entries (filtered from 887 total unique entries)

**Supplement 2: Risk of Bias assessment**

The following data is extracted from the Risk of Bias assessment tool (RoB2) which can be downloaded [here](https://sites.google.com/site/riskofbiastool/welcome/rob-2-0-tool/current-version-of-rob-2).

NI = No Information
PN = Probably No
PY = Probably Yes

2019 Kawamata

| **Domain 1: Randomization process** | | |
| --- | --- | --- |
| **Bias** | **Judgement** | **Support for judgment** |
| Random sequence generation | Yes | "Patients who met the transition criteria were randomized 1:1 in a double-blind manner using a randomization table. A statistical minimization method was used for randomization, with the following two allocation factors: the dose of S-8117 and the change in BPI 24-hour average pain intensity score from visit 1, both at the end of the titration period." |
| Allocation concealment | NI |  |
| Baseline imbalances | No | "No differences were noted in the baseline characteristics of patients across the treatment groups in the double-blind study" |
| Overall randomization bias | Some concerns | |
| **Domain 2: Deviations from intended interventions** | | |
| **Bias** | **Judgement** | **Support for judgment** |
| Participants’ awareness assigned intervention | NI | COMMENT: adverse drug reactions were in the active group: 50% and in the placebo group 30.9%. |
| Personnel’s’ awareness assigned intervention | NI | “double-blind study” |
| Analyzed differently than to assigned group | PN | COMMENT: all patients were taken into the intent-to-treat analysis. |
| Overall performance bias | Low | |
| **Domain 3: Missing outcome data** | | |
| **Bias** | **Judgement** | **Support for judgment** |
| Availability outcome (nearly) all data | Yes | COMMENT: all 130 patients entering the double-blind study have been taken in the primary endpoint.  COMMENT: since the primary endpoint is time to loss of therapeutic response, we stated 'probably yes'. |
| Overall attrition bias | Low | |
| **Domain 4: Measurement of the outcome** | | |
| **Bias** | **Judgement** | **Support for judgment** |
| Outcome assessor’s awareness of received intervention | PN | COMMENT: for patient-reported outcomes, the outcome assessor is the study participant. Since the trial was double-blind we answered 'probably not'.  "During the double-blind period, 90 AEs were reported in 45 of 62 (72.6%) patients in the S-8117 group and 77 AEs in 37 of 68 (54.4%) patients in the placebo group (Table 3); 50 ADRs were reported in 31 of 62 (50.0%) patients in the S-8117 group and 38 ADRs in 21 of 68 (30.9%) patients in the placebo group." |
| Overall outcome bias | Low | |
| **Domain 5: Selective reporting** | | |
| Selection of outcome measurements | No | COMMENT: outcomes reported as outlined in JapicCTI-132299. |
| Multiple analyses of data | PN | "The time to inadequate analgesic response in the double-blind study was compared between the treatment groups by the stratified log-rank test, adjusted by the allocation factors. The proportion of inadequate analgesic response and the proportion of discontinuation due to inadequate analgesic response or AEs in the double-blind study were compared between the treatment groups using the Mantel–Haenszel test with stratified factors." |
| Overall reporting bias | Low | |
| **Overall bias** | Some concerns | |

2017, Zakrzewska

| **Domain 1: Randomization process** | | |
| --- | --- | --- |
| **Bias** | **Judgement** | **Support for judgment** |
| Random sequence generation | Yes | "randomisation according to a computer-generated, centralised schedule" |
| Allocation concealment | Yes | “computer-generated, centralised schedule" |
| Baseline imbalances | No | "Characteristics were similar between treatment groups in the double-blind phase, except for a slightly higher number of women in the BIIB074 group (table 1)." |
| Overall randomization bias | Low | |
| **Domain 2: Deviations from intended interventions** | | |
| **Bias** | **Judgement** | **Support for judgment** |
| Participants’ awareness assigned intervention | PY | "During assessment of masking at the end of double-blind treatment, ten (67%) of 15 patients and clinicians for 11 (73%) of 15 patients in the BIIB074 group guessed  their treatment allocation correctly. In the placebo group, patients and clinicians guessed allocations correctly for ten (71%) of 14 patients." |
| Personnel’s’ awareness assigned intervention | PY | COMMENT: see citation here above. |
| Deviations beyond expected practice | PN | COMMENT: in the active group 5 patients, and in placebo group 4 patients experienced adverse events. |
| Analyzed differently than to assigned group | PN | COMMENT: all patients were included in the intention-to-treat analysis. |
| Overall performance bias | Low | |
| **Domain 3: Missing outcome data** | | |
| **Bias** | **Judgement** | **Support for judgment** |
| Availability outcome (nearly) all data | PY | COMMENT: since the primary endpoint is loss of therapeutic response, we stated 'probably yes'.  "29 out of 30 randomized patients have been used in the modified intention-to-treat population. 1 randomised but no double-blind medication available and withdrew consent before dosing."  COMMENT: more than 95% was included in the analysis. |
| Overall attrition bias | Low | |
| **Domain 4: Measurement of the outcome** | | |
| **Bias** | **Judgement** | **Support for judgment** |
| Outcome assessor’s awareness of received intervention | PN | COMMENT: for patient-reported outcomes, the outcome assessor is the study participant. Since the trial was double-blind we answered 'probably not'.  "During assessment of masking at the end of double-blind treatment, ten (67%) of 15 patients and clinicians for 11 (73%) of 15 patients in the BIIB074 group guessed their treatment allocation correctly. In the placebo group, patients and clinicians guessed allocations correctly for ten (71%) of 14 patients." |
| Overall outcome bias | Low | |
| **Domain 5: Selective reporting** | | |
| Selection of outcome measurements | No | Clinicaltrials.gov, 28-02-2012: "The number of failures on CNV1014802 vs. number of failures on placebo during the double-blind treatment period will be the primary outcome of the study. Patients will be classified as a treatment failure if they meet one of the following criteria:  - 50% increase in the frequency of paroxysms compared to the final 7 days of the open-label period  - 50% increase in the severity of pain experienced in the paroxysms compared to the final 7 days of the open-label period  - A Patient Global Improvement of Change rating of much worse/very much worse  - The patient discontinues the study due to 'Lack of Efficacy'. The patient discontinues due to an adverse reaction or poor tolerability considered to be related to study medication"  Paper: "The primary endpoint was the difference between groups in the number of patients classified as treatment failure during the double-blind phase.......  Treatment failure was determined on the basis of meeting at least one of the following criteria:  more than three paroxysms in 7 days and either a 50% increase or more in the frequency of paroxysms, or a 50% increase or more in the severity of paroxysms, compared with the final 7 days of open-label treatment; PGIC rating of much worse or very much worse (relative to the end of the open-label phase); or the patient discontinued because of an absence of efficacy (as defined and reported by the patient or clinician), or because of an adverse reaction or poor tolerability considered to be related to the study medication"  COMMENT: outcome measures were reported in the paper. |
| Multiple analyses of data | PN | "For the primary analysis, we compared the number of treatment failures with BIIB074 versus placebo in the mITT population using Fisher’s exact test." |
| Overall reporting bias | Low | |
| **Overall Bias** | Low | |

2017, Huffman

| **Domain 1: Randomization process** | | |
| --- | --- | --- |
| **Bias** | **Judgement** | **Support for judgment** |
| Random sequence generation | PY | "Randomization was performed by an interactive voice response system"  "Treatment in the double-blind phase was blinded to both study investigators and patients." |
| Allocation concealment | Yes | "Randomization was performed by an interactive voice response system" |
| Baseline imbalances | No | "clinical characteristics were similar between the study phases and treatment groups" |
| Overall randomization bias | Low | |
| **Domain 2: Deviations from intended interventions** | | |
| **Bias** | **Judgement** | **Support for judgment** |
| Participants’ awareness assigned intervention | PN | COMMENT: the first phase was single-blind.  COMMENT: adverse events in the active group: 38.5%, and in the placebo group 30.7%.  COMMENT: adverse events occurred in both groups.  "Treatment in the double-blind phase was blinded to both study investigators and patients." |
| Personnel’s’ awareness assigned intervention | No | "Treatment in the double-blind phase was blinded to both study investigators and patients." |
| Analyzed differently than to assigned group | PN | COMMENT: all patients were taken into the intention-to-treat analysis. |
| Overall performance bias | Low | |
| **Domain 3: Missing outcome data** | | |
| **Bias** | **Judgement** | **Support for judgment** |
| Availability outcome (nearly) all data | PY | COMMENT: all 413 patients were taken in the primary analysis.  COMMENT: since the primary endpoint is time to loss of therapeutic response, we stated 'probably yes'. |
| Overall attrition bias | Low | |
| **Domain 4: Measurement of the outcome** | | |
| **Bias** | **Judgement** | **Support for judgment** |
| Outcome assessor’s awareness of received intervention | PN | COMMENT: for patient-reported outcomes, the outcome assessor is the study participant. Since the trial was double-blind we answered 'probably not'.  COMMENT: in the active group: 38.5%, and in the placebo group 30.7% adverse events occurred. |
| Overall outcome bias | Low |  |
| **Domain 5: Selective reporting** | | |
| Selection of outcome measurements | No | Clinicaltrials.gov, 04-01-2011: "Time to loss of therapeutic response (LTR), defined as <30% pain response relative to the baseline phase or patient discontinuation due to lack of efficacy, in the double-blind phase of the study."  Paper: "the time to loss of therapeutic response (LTR), defined as <30% pain response relative to single-blind baseline or discontinuation due to adverse event (AE) or lack of efficacy." |
| Multiple analyses of data | PN | "Four sensitivity analyses were performed on the primary end point, using the full analysis set (FAS), where patients who withdrew from the study for any reason were designated as a LTR; patients who withdrew due to lack of efficacy before LTR were designated as a LTR (all other  withdrawals, including AEs, were censored); patients who withdrew within the first week of the double-blind phase were censored; and patients who withdrew due to lack of efficacy before LTR were censored." |
| Overall reporting bias | Low | |
| **Overall Bias** | Low | |

2016, Rauck

| **Domain 1: Randomization process** | | |
| --- | --- | --- |
| **Bias** | **Judgement** | **Support for judgment** |
| Random sequence generation | NI | "Patients were randomized in a 1:1 ratio to receive either BBUP twice daily at the same optimal dose reached at the end of the open-label phase or placebo."  COMMENT: no method of randomization was provided. |
| Allocation concealment | NI | COMMENT: nothing about allocation concealment was provided. |
| Baseline imbalances | No | "Baseline characteristics were similar for patients entering the open-label titration phase (safety population) and the subgroup of patients randomized to the double-blind treatment." |
| Overall randomization bias | Some concerns | |
| **Domain 2: Deviations from intended interventions** | | |
| **Bias** | **Judgement** | **Support for judgment** |
| Participants’ awareness assigned intervention | NI | "A similar percentage of patients treated with BBUP (16.6%) and placebo (17.2%) experienced treatment-related AEs during double-blind treatment (Table 4)." |
| Personnel’s’ awareness assigned intervention | NI |  |
| Deviations beyond expected practice | PN |  |
| Analyzed differently than to assigned group | PN | COMMENT: one site dropped out (41 patients) with balanced distribution of patients between groups. The other patients using at least 1 dose were taken in the intention-to-treat analysis. |
| Overall performance bias | Low | |
| **Domain 3: Missing outcome data** | | |
| **Bias** | **Judgement** | **Support for judgment** |
| Availability outcome (nearly) all data | PY | COMMENT: missing data were handled as follows: screening observation carried forward due to adverse events, baseline observation carried forward due to opioid withdrawal symptoms, last observation carried forward due to lack of efficacy and multiple imputation approach due to other reasons.  COMMENT: one site was excluded: 41 out of 461 patients: 8.5% which is more than 5%. |
| Overall attrition bias | Low | |
| **Domain 4: Measurement of the outcome** | | |
| **Bias** | **Judgement** | **Support for judgment** |
| Outcome assessor’s awareness of received intervention | PN | COMMENT: for patient-reported outcomes, the outcome assessor is the study patient. Since the trial was double-blind we answered 'probably not'.  "During the double-blind treatment phase (Table 4), the percent of patients reporting any AE was similar between patients treated with BBUP (41.0%) or placebo (43.5%; Table 4)."  COMMENT: treatment related adverse events active group: 16.6%, placebo group: 17.2%. |
| Overall outcome bias | Low | |
| **Domain 5: Selective reporting** | | |
| Selection of outcome measurements | No | Clinicaltrials.gov, 5-7-2012: "Determine the analgesic efficacy of BEMA Buprenorphine in opioid-naive subjects with moderate to severe CLBP requiring continuous ATC opioid analgesia Change from baseline to Week 12 of double-blind treatment phase in the mean of average daily pain intensity scores."  Paper: "The primary efficacy end point was the change in the mean NRS average daily pain intensity score from baseline to week 12." |
| Multiple analyses of data | Yes | "A sample size re-estimation was done after 50% of the target sample size completed the 12-week double-blind period. No change in sample size was made. Analysis of covariance (ANCOVA) was used to assess change from baseline to week 12 in the primary efficacy end point of NRS pain scores, with a supportive sensitivity analysis using a likelihood-based mixed-effects model repeated measures (MMRM) method." |
| Overall reporting bias | High | |
| **Overall Bias** | High | |

2016, Gimbel

| **Domain 1: Randomization process** | | |
| --- | --- | --- |
| **Bias** | **Judgement** | **Support for judgment** |
| Random sequence generation | NI | "Randomization codes were generated by the sponsor or designee." |
| Allocation concealment | Yes | "The randomization codes were stored in a secure electronic format within the IXRS system." |
| Baseline imbalances | No | "The randomized treatment groups were well balanced with respect to age, body mass index, and sex, as well as baseline pain-intensity scores" |
| Overall randomization bias | Low | |
| **Domain 2: Deviations from intended interventions** | | |
| **Bias** | **Judgement** | **Support for judgment** |
| Participants’ awareness assigned intervention | NI | COMMENT: treatment related adverse events are similar: active group: 16.5%, placebo group: 22.7%. |
| Personnel’s’ awareness assigned intervention | NI |  |
| Deviations beyond expected practice | PN |  |
| Analyzed differently than to assigned group | PN | COMMENT: one site dropped out (19 patients) with balanced distribution of patients between groups. The other patients using at least 1 dose were taken in the intention-to-treat analysis. |
| Overall performance bias | Low | |
| **Domain 3: Missing outcome data** | | |
| **Bias** | **Judgement** | **Support for judgment** |
| Availability outcome (nearly) all data | PY | COMMENT: missing data were handled as follows: screening observation carried forward due to adverse events, baseline observation carried forward due to opioid withdrawal symptoms, last observation carried forward due to lack of efficacy and multiple imputation approach due to other reasons.  "One site (19 patients) was excluded from the efficacy analysis because of inadequate control of data quality but was included in the safety analysis. 1 patient did not receive medication."  COMMENT: 3.9% is not taken into analysis of primary endpoint, this is less than 5%: 9 patients in placebo group and 11 patients in buprenorphine group were left out. |
| Overall attrition bias | Low | |
| **Domain 4: Measurement of the outcome** | | |
| **Bias** | **Judgement** | **Support for judgment** |
| Outcome assessor’s awareness of received intervention | PN | COMMENT: for patient-reported outcomes, the outcome assessor is the study patient. Since the trial was double-blind we answered 'probably not'.  COMMENT: treatment related adverse events are similar: active group: 16.5%, placebo group: 22.7%. |
| Overall outcome bias | Low | |
| **Domain 5: Selective reporting** | | |
| Selection of outcome measurements | No | Clinicaltrials.gov, 27-08-2012: "Primary Outcome Measures: 1. Determine the analgesic efficacy of EN3409 in opioid-experience subjects with moderate to severe CLBP requiring continuous ATC opioid analgesia Change from baseline to Week 12 of double-blind treatment phase in the mean of average daily pain intensity scores"  Paper: "The primary endpoint was the change in mean average daily pain score from baseline (at randomization) to week 12 of the double-blind treatment period and was analyzed using an analysis of covariance (ANCOVA) with treatment and covariates of screen pain-intensity score" |
| Multiple analyses of data | PY | "The primary endpoint was the change in mean average daily pain score from baseline (at randomization) to week 12 of the double-blind treatment period and was analyzed using an analysis of covariance (ANCOVA) with treatment and covariates of screen pain-intensity score (before the open-label titration phase) and baseline pain intensity score (before randomization) as effects. Based on a prespecified sample size re-estimation at the interim analysis, the study sample size was increased from 142/arm to 250/arm to give a conditional power of 83%." |
| Overall reporting bias | High | |
| **Overall Bias** | High | |

2015, Wen

| **Domain 1: Randomization process** | | |
| --- | --- | --- |
| **Bias** | **Judgement** | **Support for judgment** |
| Random sequence generation | NI | "Patients were randomized in a 1:1 ratio to receive HYD (at the stable dose achieved during the open-label run-in period [20, 40, 60, 80, or 120 mg]) or matching placebo. Randomization was stratified by the patient’s HYD dose at the end of the open label run-in period and by opioid status." |
| Allocation concealment | NI |  |
| Baseline imbalances | No | "In general, patient characteristics, including demographics, screening pain intensity, medical history, and prior medication use were similar between the nonrandomized and randomized patients, and balanced between double-blind treatment groups (Tables 1,2,3 and 4)." |
| Overall randomization bias | Some concerns | |
| **Domain 2: Deviations from intended interventions** | | |
| **Bias** | **Judgement** | **Support for judgment** |
| Participants’ awareness assigned intervention | NI | COMMENT: treatment related adverse events were similar: gastrointestinal disorders, active group 45%, placebo group 43%. |
| Personnel’s’ awareness assigned intervention | NI |  |
| Deviations beyond expected practice | PN |  |
| Analyzed differently than to assigned group | PN | COMMENT: all 588 patients were taken into the intention-to-treat analysis. |
| Overall performance bias | Low | |
| **Domain 3: Missing outcome data** | | |
| **Bias** | **Judgement** | **Support for judgment** |
| Availability outcome (nearly) all data | PY | COMMENT: drop-outs were handled as follows: due to adverse events with screening observation carried forward and last observation carried forward due to other reasons  COMMENT: all 588 patients were taken into primary analysis. |
| Overall attrition bias | Low | |
| **Domain 4: Measurement of the outcome** | | |
| **Bias** | **Judgement** | **Support for judgment** |
| Outcome assessor’s awareness of received intervention | PN | COMMENT: For patient-reported outcomes, the outcome assessor is the study patient. Since the trial was double-blind we answered 'probably not'.  "During the first 2 weeks of the double-blind period, patients randomized to placebo had their HYD doses tapered in a blinded manner" |
| Overall outcome bias | Low | |
| **Domain 5: Selective reporting** | | |
| Selection of outcome measurements | No | Clinicaltrials.gov, 12-10-2011: "Mean pain intensity for "average pain over the last 24 hours" score (on an 11-point numerical rating scale where 0 = no pain and 10 = pain as bad as you can imagine)."  Paper: "The primary efficacy variable was the mean weekly pain intensity during the double-blind period" |
| Multiple analyses of data | PN | "Analysis of the weekly mean pain intensity scores was performed using a mixed effects model with repeated measures (MMRM) incorporating a pattern mixture model (PMM) framework to account for missing data, and using restricted maximum likelihood estimation. Four sensitivity analyses of the primary endpoint were conducted." |
| Overall reporting bias | Low | |
| **Overall Bias** | Some concerns | |

2015, Rauck

| **Domain 1: Randomization process** | | |
| --- | --- | --- |
| **Bias** | **Judgement** | **Support for judgment** |
| Random sequence generation | NI | "Patients randomized to the placebo group received a gradual blinded taper of ALO-02 to avoid withdrawal symptoms and maintain blinding; patients were tapered off ALO-02 incrementally over the course of 2 weeks depending on their total daily dose before taper."  COMMENT: no information is given how randomization was executed. |
| Allocation concealment | NI | COMMENT: no information is given how allocation concealment was performed. |
| Baseline imbalances | No | "Overall characteristics between the randomized groups were similar (Table 1)." |
| Overall randomization bias | Some concerns | |
| **Domain 2: Deviations from intended interventions** | | |
| **Bias** | **Judgement** | **Support for judgment** |
| Participants’ awareness assigned intervention | PN | "Patients randomized to the placebo group received a gradual blinded taper of ALO-02 to avoid withdrawal symptoms and maintain blinding"  "More patients in the ALO-02 group vs the placebo group experienced at least 1 treatment-related TEAE (n = 39 [26.7%] and n = 23 [17.2%], respectively)" |
| Personnel’s’ awareness assigned intervention | NI |  |
| Deviations beyond expected practice | PN |  |
| Analyzed differently than to assigned group | PN | COMMENT: one out of 281 patients was left out intention-to-treat analysis not receiving study medication. |
| Overall performance bias | Low | |
| **Domain 3: Missing outcome data** | | |
| **Bias** | **Judgement** | **Support for judgment** |
| Availability outcome (nearly) all data | PY | COMMENT: missing data were handled as follows: screening observation carried forward due to adverse events and lack of efficacy, baseline observation carried forward due to opioid withdrawal symptoms in the placebo group, and multiple imputation approach due to other reasons.  "All but 1 patient received at least 1 dose of study drug and constituted the ITT population."  COMMENT: one out of 281 patients was left out the ITT analysis. |
| Overall attrition bias | Low | |
| **Domain 4: Measurement of the outcome** | | |
| **Bias** | **Judgement** | **Support for judgment** |
| Outcome assessor’s awareness of received intervention | PN | COMMENT: For patient-reported outcomes, the outcome assessor is the study participant. Since the trial was double-blind we answered 'probably not'.  "Patients randomized to the placebo group received a gradual blinded taper of ALO-02 to avoid withdrawal symptoms and maintain blinding; patients were tapered off ALO-02 incrementally over the course of 2 weeks depending on their total daily dose before taper." |
| Overall outcome bias | Low | |
| **Domain 5: Selective reporting** | | |
| Selection of outcome measurements | PN | Clinicaltrials.gov: 03-04-2012: "Change in baseline in daily average pain numerical rating scale scores"  Paper: "The primary end point of this study was defined as the mean change in weekly average diary NRS-Pain scores from randomization baseline to the final 2 weeks of the double-blind treatment period." |
| Multiple analyses of data | PN | "The primary end point was evaluated using analysis of covariance (ANCOVA), with treatment and previous pain analgesic status as categorical factors and the randomization baseline score and final total daily dose of the titration period as covariates. Multiple imputation linear regression procedures were performed 100 times to obtain 100 data sets with “complete” data. Overall assessment of the primary end point was carried out by combining results across the 100 data sets" |
| Overall reporting bias | Low | |
| **Overall Bias** | Some concerns | |

2015, Katz

| **Domain 1: Randomization process** | | |
| --- | --- | --- |
| **Bias** | **Judgement** | **Support for judgment** |
| Random sequence generation | Yes | "Patients were assigned a unique randomization number by an interactive web response system; an external-to study, unblinded biostatistician prepared randomization codes." |
| Allocation concealment | Yes | “an external-to study, unblinded biostatistician prepared randomization codes.” |
| Baseline imbalances | No | "Baseline characteristics such as age, body mass index, race, and ethnicity were similar in both treatment arms." |
| Overall randomization bias | Low | |
| **Domain 2: Deviations from intended interventions** | | |
| **Bias** | **Judgement** | **Support for judgment** |
| Participants’ awareness assigned intervention | NI | "Treatment related TEAEs were experienced by" ...... "104 (26.7%) patients during the double-blind maintenance phase (65 [33.7%] patients in the Xtampza ER group and 39 [19.9%] patients in the placebo group; Table 3)." |
| Personnel’s’ awareness assigned intervention | NI |  |
| Deviations beyond expected practice | PN |  |
| Analyzed differently than to assigned group | PN | COMMENT: all patients were taken into the intention-to-treat analysis.  "Baseline characteristics such as age, body mass index, race, and ethnicity were similar in both treatment arms." |
| Overall performance bias | Low | |
| **Domain 3: Missing outcome data** | | |
| **Bias** | **Judgement** | **Support for judgment** |
| Availability outcome (nearly) all data | NI | COMMENT: no information is given on the imputation method of the primary analysis.  COMMENT: all patients were taken into the analysis. |
| Proportions missing data similar across groups | PY | COMMENT: difference between drop-outs due to adverse events was less than 10% between groups. |
| Overall attrition bias | Low | |
| **Domain 4: Measurement of the outcome** | | |
| **Bias** | **Judgement** | **Support for judgment** |
| Outcome assessor’s awareness of received intervention | PN | COMMENT: for patient-reported outcomes, the outcome assessor is the study participant. Since the trial was double-blind we answered 'probably not'.  "Patients randomized to the placebo arm were tapered in a blinded manner from the stable dose of Xtampza ER established during the open-label titration phase for up to 20 days to prevent opioid withdrawal symptoms" |
| Overall outcome bias | Low |  |
| **Domain 5: Selective reporting** | | |
| Selection of outcome measurements | No | Clinicaltrials.gov, 12-09-2012: "Change in average pain intensity measured by the change in PI-NRS scores from Randomization Baseline to Week 12 of the Double-blind Maintenance Phase"  Paper: "The primary efficacy endpoint was the change in average pain intensity measured by the change in PI-NRS scores from randomization baseline to week 12 of the double-blind maintenance phase." |
| Multiple analyses of data | PN | "The primary model included the change from randomization baseline as the dependent variable, treatment group and opioid subtype (opioid-experienced and opioid-naive) as factors, and randomization baseline pain score as a covariate. The least squares means of the treatment groups and 95% confidence intervals of the difference between treatments were estimated from the model." |
| Overall reporting bias | Low | |
| **Overall Bias** | Low | |

2015, Hale, lumbago

| **Domain 1: Randomization process** | | |
| --- | --- | --- |
| **Bias** | **Judgement** | **Support for judgment** |
| Random sequence generation | Yes | "Patients were randomly assigned to treatment 1:1 through a qualified randomization service provider (Almac Clinical Services, Souderton, PA) using an interactive response technology system. Patients and investigators remained blinded to treatment assignment, but not dosage, during the study." |
| Allocation concealment | Yes |  |
| Baseline imbalances | No | "Characteristics were well matched between groups." |
| Overall randomization bias | Low | |
| **Domain 2: Deviations from intended interventions** | | |
| **Bias** | **Judgement** | **Support for judgment** |
| Participants’ awareness assigned intervention | PN | "With respect to withdrawal symptoms, mean patient-rated SOWS scores were similar between treatment groups at all time points." "Placebo drug matched the active drug and contained identical microspheres with the exception of oxycodone."  COMMENT: in both groups obstipation and nausea was present. Furthermore, patients could take the study medication as escape medication, which was taken in both groups, placebo more than active group. |
| Personnel’s’ awareness assigned intervention | PN |  |
| Analyzed differently than to assigned group | No | COMMENT: the intent-to-treat analysis set comprised all randomly assigned patients. |
| Overall performance bias | Low | |
| **Domain 3: Missing outcome data** | | |
| **Bias** | **Judgement** | **Support for judgment** |
| Availability outcome (nearly) all data | NI | COMMENT: multiple imputations for drop-outs  "The intent-to-treat analysis set comprised all randomly assigned patients." |
| Proportions missing data similar across groups | PN | COMMENT: more than 10% difference in drop-outs due to adverse events in the active group. |
| Evidence of robustness of results | PY | "The primary efficacy analysis was robust and all sensitivity analyses supported the positive results regarding the estimated treatment effect reported above." |
| Overall attrition bias | Low | |
| **Domain 4: Measurement of the outcome** | | |
| **Bias** | **Judgement** | **Support for judgment** |
| Outcome assessor’s awareness of received intervention | PN | COMMENT: for patient-reported outcomes, the outcome assessor is the study participant. Since the trial was double-blind we answered 'probably not'.  "Patients and investigators remained blinded to treatment assignment" |
| Overall outcome bias | Low |  |
| **Domain 5: Selective reporting** | | |
| Selection of outcome measurements | PN | Clinicaltrials.gov, 08-02-2013: "Weekly average of daily worst pain intensity (WPI) scores."  Paper: "The primary efficacy measure was change from baseline (end of open-label titration) to week 12 in the weekly average of WPI [worst pain intensity] scores." |
| Multiple analyses of data | PN | “excessive rescue medication use, (3) WPI scores collected after discontinuation of study drug treatment, (4) WPI scores recorded before rescue medication use, and (5) potential, unintentional unblinding of patients who rolled over to a separate long-term, open-label safety study." |
| Overall reporting bias | Low | |
| **Overall Bias** | Low | |

2015, Hale, lumbago and osteoarthritis

| **Domain 1: Randomization process** | | |
| --- | --- | --- |
| **Bias** | **Judgement** | **Support for judgment** |
| Random sequence generation | Yes | "The randomization code was generated by the study sponsor and reviewed by a statistician not assigned to the study. Patients were randomly assigned with an interactive voice/web response system to ensure balance across treatment groups. Patients, investigators, and all study sponsor clinical personnel remained blinded throughout the study." |
| Allocation concealment | Yes |  |
| Baseline imbalances | No | "Patient demographics and other baseline characteristics were similar between treatment groups (Table 1)." |
| Overall randomization bias | Low | |
| **Domain 2: Deviations from intended interventions** | | |
| **Bias** | **Judgement** | **Support for judgment** |
| Participants’ awareness assigned intervention | NI | "matching placebo"  "During the double-blind treatment period, 93 (64%) patients in the hydrocodone ER group and 91 (62%) patients in the placebo group reported at least one AE. The most frequently occurring AEs were constipation (13% vs 5%, respectively) and nausea (13% vs 6%, respectively)." |
| Personnel’s’ awareness assigned intervention | PN |  |
| Analyzed differently than to assigned group | PN | "All randomized patients who received at least one dose of study medication during the double-blind treatment period were evaluable for primary and secondary efficacy analyses." |
| Overall performance bias | Low | |
| **Domain 3: Missing outcome data** | | |
| **Bias** | **Judgement** | **Support for judgment** |
| Availability outcome (nearly) all data | NI | COMMENT: multiple imputations for drop-outs  "One patient randomized to receive placebo did not receive study medication and was therefore not evaluable for efficacy."  COMMENT: one out of 294 patients was not included. |
| Proportions missing data similar across groups | PN | COMMENT: more than 10% difference in drop-outs due to adverse events in the active group. |
| Evidence of robustness of results | NI | COMMENT: no sensitivity analyses were performed. |
| Overall attrition bias | High | |
| **Domain 4: Measurement of the outcome** | | |
| **Bias** | **Judgement** | **Support for judgment** |
| Outcome assessor’s awareness of received intervention | PN | COMMENT: for patient-reported outcomes, the outcome assessor is the study participant. Since the trial was double-blind we answered 'probably not'.  "Patients, investigators, and all study sponsor clinical personnel remained blinded throughout the study." |
| Overall outcome bias | Low |  |
| **Domain 5: Selective reporting** | | |
| Selection of outcome measurements | No | Clinicaltrials.gov, 12-11-2010: "Change in the weekly Average Pain Intensity (API) Weekly Average Pain. Intensity (API) based on the 11-point Numerical Rating Scale (NRS-11) from electronic diary"  Paper: "The primary efficacy measure was the change from baseline (final visit of the open-label titration period) to week 12 in the mean weekly API. Patients recorded their API and worst pain intensity (WPI) scores daily in an electronic diary using an eleven-point numeric rating scale (0=no pain, 10=worst pain imaginable)." |
| Multiple analyses of data | No | "The primary efficacy measure was analyzed using an analysis of covariance model, with treatment and previous opioid treatment status as fixed effects and screening and baseline pain intensities as covariates." |
| Overall reporting bias | Low | |
| **Overall Bias** | High | |

2015, Arai, lumbago and osteoarthritis

| **Domain 1: Randomization process** | | |
| --- | --- | --- |
| **Bias** | **Judgement** | **Support for judgment** |
| Random sequence generation | NI | "randomly assigned (1:1) to receive either fentanyl at the final dose administered during period I or a matching placebo for 12 weeks. Patients who were assigned to take placebo in the period II were allowed to take fentanyl under blind for opioid tapering."  COMMENT: no information on the randomization technique |
| Allocation concealment | NI |  |
| Baseline imbalances | No | "There were no significant between-group differences in demographic and baseline characteristics (Table 2)." |
| Overall randomization bias | Some concerns | |
| **Domain 2: Deviations from intended interventions** | | |
| **Bias** | **Judgement** | **Support for judgment** |
| Participants’ awareness assigned intervention | PN | "matching placebo" "the incidence of AEs was higher in the fentanyl group (68.5%, 113 events in 50/73 subjects) than in the placebo group (46.8%, 98 events in 36/77 subjects)" |
| Personnel’s’ awareness assigned intervention | PN |  |
| Analyzed differently than to assigned group | PN | COMMENT: all patients were entered in the intention-to-treat analysis. |
| Overall performance bias | Low | |
| **Domain 3: Missing outcome data** | | |
| **Bias** | **Judgement** | **Support for judgment** |
| Availability outcome (nearly) all data | PY | COMMENT: since the primary endpoint is time to loss of therapeutic response, we stated 'probably yes'.  COMMENT: all patients were taken into the analysis.  "By using the Kaplan–Meier survival method, the time to discontinuation caused by insufficient pain relief was longer in the fentanyl group (Figure 3A), but the difference between the treatment groups was not significant." |
| Overall attrition bias | Low | |
| **Domain 4: Measurement of the outcome** | | |
| **Bias** | **Judgement** | **Support for judgment** |
| Outcome assessor’s awareness of received intervention | PN | COMMENT: for patient-reported outcomes, the outcome assessor is the study participant. Since the trial was double-blind we answered 'probably not'.  "Patients who were assigned to take placebo in the period II were allowed to take fentanyl under blind for opioid tapering. Administration of a fast-acting oral morphine formulation (morphine hydrochloride at a dose of 5mg per fentanyl 12.5 mg/h) was allowed as a rescue treatment for breakthrough pain during period II." |
| Overall outcome bias | Low |  |
| **Domain 5: Selective reporting** | | |
| Selection of outcome measurements | No | Clinicaltrials.gov, 05-11-2009: "Time (number of days) from the initial day of patch application in treatment period II (double-blind period) to discontinuation due to insufficient analgesic efficacy."  Paper: "The primary endpoint was the number of days from the day of study drug initiation in period II to withdrawal because of insufficient analgesic efficacy. The discontinuation criteria included the worsening of the mean VAS score by 415 mm for three consecutive days compared to that in the last 3 days of period I; the number of times rescue medication used 3/day for five or more days after the initiation of period II; the mean number of times rescue medication used for three consecutive days increased by 41/day compared to that in the last 3 days of period I; a request for study discontinuation due to insufficient analgesia; and an increase in study drug dosage." |
| Multiple analyses of data | No | "Primary efficacy analysis: By using the Kaplan–Meier survival method, the time to discontinuation caused by insufficient pain relief was longer in the fentanyl group (Figure 3A), but the difference between the treatment groups was not significant" |
| Overall reporting bias | Low | |
| **Overall Bias** | Some concerns | |

2015, Arai, neuropathic pain

| **Domain 1: Randomization process** | | |
| --- | --- | --- |
| **Bias** | **Judgement** | **Support for judgment** |
| Random sequence generation | NI | "randomly assigned (1:1) to receive either fentanyl at the final dose administered during period I or a matching placebo for 12 weeks. Patients who were assigned to take placebo in the period II were allowed to take fentanyl under blind for opioid tapering."  COMMENT: no information on the randomization technique |
| Allocation concealment | NI |  |
| Baseline imbalances | No | "There were no significant between-group differences in demographic and baseline characteristics (Table 2)." |
| Overall randomization bias | Some concerns | |
| **Domain 2: Deviations from intended interventions** | | |
| **Bias** | **Judgement** | **Support for judgment** |
| Participants’ awareness assigned intervention | PN | "matching placebo" "the incidence of AEs was higher in the fentanyl group (85.7%, 188 events in 72/84 subjects) than in the placebo group (70.9%, 123 events in 56/79 subjects)" |
| Personnel’s’ awareness assigned intervention | PN |  |
| Analyzed differently than to assigned group | PN | COMMENT: all patients were entered in the intention-to-treat analysis. |
| Overall performance bias | Low | |
| **Domain 3: Missing outcome data** | | |
| **Bias** | **Judgement** | **Support for judgment** |
| Availability outcome (nearly) all data | PY | COMMENT: since the primary endpoint is time to loss of therapeutic response, we stated 'probably yes'.  COMMENT: all patients were taken into the analysis.  "By using the Kaplan–Meier survival method, the time to discontinuation caused by insufficient pain relief was significantly longer in the fentanyl group (Figure 3B)." |
| Overall attrition bias | Low | |
| **Domain 4: Measurement of the outcome** | | |
| **Bias** | **Judgement** | **Support for judgment** |
| Outcome assessor’s awareness of received intervention | PN | COMMENT: for patient-reported outcomes, the outcome assessor is the study participant. Since the trial was double-blind we answered 'probably not'.  "Patients who were assigned to take placebo in the period II were allowed to take fentanyl under blind for opioid tapering. Administration of a fast-acting oral morphine formulation (morphine hydrochloride at a dose of 5mg per fentanyl 12.5 mg/h) was allowed as a rescue treatment for breakthrough pain during period II." |
| Overall outcome bias | Low |  |
| **Domain 5: Selective reporting** | | |
| Selection of outcome measurements | No | Clinicaltrials.gov, 05-11-2009: "Time (number of days) from the initial day of patch application in treatment period II (double-blind period) to discontinuation due to insufficient analgesic efficacy."  Paper: "The primary endpoint was the number of days from the day of study drug initiation in period II to withdrawal because of insufficient analgesic efficacy. The discontinuation criteria included the worsening of the mean VAS score by 415 mm for three consecutive days compared to that in the last 3 days of period I; the number of times rescue medication used 3/day for five or more days after the initiation of period II; the mean number of times rescue medication used for three consecutive days increased by 41/day compared to that in the last 3 days of period I; a request for study discontinuation due to insufficient analgesia; and an increase in study drug dosage." |
| Multiple analyses of data | No | "Primary efficacy analysis: "By using the Kaplan–Meier survival method, the time to discontinuation caused by insufficient pain relief was significantly longer in the fentanyl group (Figure 3B)." |
| Overall reporting bias | Low | |
| **Overall Bias** | Some concerns | |

2014, Vinik

| **Domain 1: Randomization process** | | |
| --- | --- | --- |
| **Bias** | **Judgement** | **Support for judgment** |
| Random sequence generation | Yes | "Randomization was balanced using randomly permuted blocks and stratified by study site and the patient’s tapentadol ER dose category (100–150 mg bid or 200–250 mg bid) at the end of titration. Patients were randomized to treatment based on a computer-generated schedule using an interactive voice response system. Tapentadol ER and placebo were identical in appearance and packaging." |
| Allocation concealment | Yes |  |
| Baseline imbalances | No | "Demographic and baseline characteristics for the double-blind safety population were similar for both treatment groups" |
| Overall randomization bias | Low | |
| **Domain 2: Deviations from intended interventions** | | |
| **Bias** | **Judgement** | **Support for judgment** |
| Participants’ awareness assigned intervention | PN | "Tapentadol ER and placebo were identical in appearance and packaging." "In the double-blind safety population, 61.2% (93/152) of patients in the placebo group and 79.5% (132/166) of patients in the tapentadol ER group reported one or more TEAEs." |
| Personnel’s’ awareness assigned intervention | PN |  |
| Analyzed differently than to assigned group | PN | COMMENT: all patients were entered in the intention-to-treat analysis. |
| Overall performance bias | Low | |
| **Domain 3: Missing outcome data** | | |
| **Bias** | **Judgement** | **Support for judgment** |
| Availability outcome (nearly) all data | PN | COMMENT: imputation method used is last observation carried forward, because when drop-out due to adverse events mostly addressed to the active treatment can inflate the results.  COMMENT: total patients 320, ITT 318 patients.  "Does not include patients who entered the study twice (one screen failure on first entry, one randomly assigned to tapentadol ER twice" |
| Proportions missing data similar across groups | PN | COMMENT: >10% difference between drop-outs due to adverse events were present. |
| Evidence of robustness of results | PY | "Sensitivity analyses performed on the primary efficacy end point showed similar statistically  significant differences favoring tapentadol ER versus placebo for all evaluated imputation methods" |
| Overall attrition bias | Low | |
| **Domain 4: Measurement of the outcome** | | |
| **Bias** | **Judgement** | **Support for judgment** |
| Outcome assessor’s awareness of received intervention | PN | COMMENT: for patient-reported outcomes, the outcome assessor is the study participant. Since the trial was double-blind we answered 'probably not'.  "Patients randomized to the placebo group were down-titrated in a blinded fashion to tapentadol ER  100 mg bid for 3 days (to reduce the risk of withdrawal symptoms) before receiving placebo for the rest of the double-blind phase." |
| Overall outcome bias | Low |  |
| **Domain 5: Selective reporting** | | |
| Selection of outcome measurements | No | ClinicalTrials.gov: 30-12-2009: "Primary outcome: The mean change from baseline to the end of the 12-week double-blind maintenance phase in the score for average pain intensity on an 11 point Numerical Rating Scale (NRS). Baseline visit and week 12 visit."  Paper: "The primary efficacy end point was the mean change in average pain intensity from baseline to week 12." |
| Multiple analyses of data | PN | "The primary efficacy end point was evaluated with an ANCOVA model that included treatment, pooled analysis site, and dose category (100–150 or 200–250 mg bid) at the end of open-label titration as factors and baseline average pain intensity at the start of double-blind treatment as a covariate. Treatment effects were estimated based on the least squares means of the changes from baseline." |
| Overall reporting bias | Low | |
| **Overall Bias** | Low | |

2014, Rauck

| **Domain 1: Randomization process** | | |
| --- | --- | --- |
| **Bias** | **Judgement** | **Support for judgment** |
| Random sequence generation | NI | "subjects were randomized (1:1) to receive either their stabilized HC-ER dose or placebo. Blinded study drug was supplied in blister packs containing either HC-ER (Zohydro® ER; Zogenix, Inc., San Diego, CA) as 10-, 20-, 30-, 40-, and 50-mg capsules or matching placebo." |
| Allocation concealment | PY |  |
| Baseline imbalances | No | "All screening characteristics were similar between the HC-ER and the placebo groups except for sex; 61.6% of subjects were female in the HC-ER group compared with 49%" |
| Overall randomization bias | Low | |
| **Domain 2: Deviations from intended interventions** | | |
| **Bias** | **Judgement** | **Support for judgment** |
| Participants’ awareness assigned intervention | PN | "Double-blinded study drug" "To minimize opioid withdrawal effects in subjects randomized to placebo, HC-ER doses were tapered during the initial 14 days of the treatment phase." "In the HC-ER group (60%) than in the placebo group (44%) experienced at least 1 TEAE (P = 0.006)." |
| Personnel’s’ awareness assigned intervention | PN |  |
| Analyzed differently than to assigned group | PN | "All screening characteristics were similar between the HC-ER and the placebo groups except for sex; 61.6% of subjects were female in the HC-ER group compared with 49%"  COMMENT: data of all 302 randomized patients were used in the ITT analysis. |
| Overall performance bias | Low | |
| **Domain 3: Missing outcome data** | | |
| **Bias** | **Judgement** | **Support for judgment** |
| Availability outcome (nearly) all data | PY | COMMENT: missing data were handled as follows: screening observation carried forward due to adverse events, baseline observation carried forward due to opioid withdrawal symptoms, last observation carried forward due to lack of efficacy and multiple imputation approach due to other reasons.  COMMENT: data of all 302 randomized patients were used in the ITT analysis. |
| Overall attrition bias | Low | |
| **Domain 4: Measurement of the outcome** | | |
| **Bias** | **Judgement** | **Support for judgment** |
| Outcome assessor’s awareness of received intervention | PN | COMMENT: for patient-reported outcomes, the outcome assessor is the study participant. Since the trial was double-blind we answered 'probably not'.  "To minimize opioid withdrawal effects in subjects randomized to placebo, HC-ER doses were tapered  during the initial 14 days of the treatment phase." |
| Overall outcome bias | Low |  |
| **Domain 5: Selective reporting** | | |
| Selection of outcome measurements | No | Clinicaltrials.com, 4-3-2010: "Mean change in 24-hour pain intensity ratings scale (NRS) Change in average pain intensity as measured daily by a 0-10 Numerical Rating Scale (NRS) comparing HC-CR with Placebo."  Paper: "The primary efficacy end point was the change in average pain intensity (PI) score from baseline (randomization) to day 85 (end of treatment) on the 11-point NRS (0 = no pain, 10 = worst pain imaginable) as recorded daily in an electronic diary." |
| Multiple analyses of data | PN | "Analysis of covariance (ANCOVA) models were used to analyze quantitative end points. The mean change from baseline to the day 85 visit was the dependent variable, and the model included treatment group as a factor and baseline pain score and screening pain score as covariates." |
| Overall reporting bias | Low | |
| **Overall Bias** | Low | |

2014, Raskin

| **Domain 1: Randomization process** | | |
| --- | --- | --- |
| **Bias** | **Judgement** | **Support for judgment** |
| Random sequence generation | Yes | "Randomization was undertaken according to a computer generated pseudorandom code using the method of random permuted blocks (blocks of 4)." |
| Allocation concealment | NI |  |
| Baseline imbalances | No | "the pregabalin and placebo treatment groups were broadly comparable." |
| Overall randomization bias | Some concerns | |
| **Domain 2: Deviations from intended interventions** | | |
| **Bias** | **Judgement** | **Support for judgment** |
| Participants’ awareness assigned intervention | PN | COMMENT: the first phase was single-blind.  "The first week of the double-blind treatment phase included a blinded taper for patients randomized to placebo and who had been treated with pregabalin (300 mg/d) in the single-blind treatment phase to mask changes in adverse events (AEs)." |
| Personnel’s’ awareness assigned intervention | NI |  |
| Deviations beyond expected practice | PN | "The frequency of AEs related to treatment was also similar across treatment groups (pregabalin: 43 [29.3%] patients; placebo: 46 [31.3%] patients)." |
| Analyzed differently than to assigned group | PN | "the pregabalin and placebo treatment groups were broadly comparable." |
| Overall performance bias | Low | |
| **Domain 3: Missing outcome data** | | |
| **Bias** | **Judgement** | **Support for judgment** |
| Availability outcome (nearly) all data | PN | COMMENT: imputation method used is last observation carried forward, because when drop-out due to adverse events (AEs) mostly addressed to the active treatment can inflate the results.  COMMENT: all 294 patients were included in the analysis of the primary endpoint. |
| Proportions missing data similar across groups | PY | COMMENT: the percentage of drop-outs due to adverse events is similar between groups. |
| Evidence of robustness of results | PY | "MMRM sensitivity analysis was consistent with this outcome, with no significant difference for pregabalin versus placebo." |
| Overall attrition bias | Low | |
| **Domain 4: Measurement of the outcome** | | |
| **Bias** | **Judgement** | **Support for judgment** |
| Outcome assessor’s awareness of received intervention | PN | COMMENT: for patient-reported outcomes, the outcome assessor is the study participant. Since the trial was double-blind we answered 'probably not'.  "Patients were blinded regarding the point of transition from the single-blind to double-blind phase. The first week of the double-blind treatment phase included a blinded taper for patients randomized to placebo and who had been treated with pregabalin (300 mg/d) in the single-blind treatment phase to mask changes in adverse events (AEs)." |
| Overall outcome bias | Low |  |
| **Domain 5: Selective reporting** | | |
| Selection of outcome measurements | PN | Clinicaltrials.gov, 26-01-2010: "Mean pain score from the daily pain diary 19 weeks"  Paper: "The primary efficacy endpoint was the change in mean pain score measured on the 11-point NRS (0=no pain, 10=worst possible pain) from single-blind baseline to double-blind endpoint, based on the previous 7 daily pain diaries, while the patient was receiving study medication." |
| Multiple analyses of data | PN | "The change in mean pain score from single-blind baseline to double-blind endpoint was also analyzed using the baseline observation carried forward (BOCF) algorithm for missing data, as a secondary endpoint. Sensitivity analyses also were conducted for the mean pain scores using a mixed-model repeated measures (MMRM) model." |
| Overall reporting bias | Low | |
| **Overall Bias** | Low | |

2014, Arnold

| **Domain 1: Randomization process** | | |
| --- | --- | --- |
| **Bias** | **Judgement** | **Support for judgment** |
| Random sequence generation | NI | ..."randomized (1:1; randomization number was assigned by the Interactive Voice Recognition System) to receive either pregabalin CR at the optimized dose or matching placebo once daily for 3 months (13 weeks). Patients remained blinded at the point of transition between the two phases." |
| Allocation concealment | Yes | "Those patients randomized to placebo underwent a blinded taper during the first week of the double-blind phase to minimize changes in AEs." |
| Baseline imbalances | No | "There were no meaningful differences among treatment groups or phase of study (Table 1)." |
| Overall randomization bias | Low | |
| **Domain 2: Deviations from intended interventions** | | |
| **Bias** | **Judgement** | **Support for judgment** |
| Participants’ awareness assigned intervention | PN | “optimized dose of pregabalin CR (330–495 mg/day) or placebo, the patient underwent a 1 week taper and was discontinued from the study."  COMMENT: the first phase was single-blind. |
| Personnel’s’ awareness assigned intervention | NI |  |
| Deviations beyond expected practice | PN | COMMENT: only 2 participants out of 122 patients randomized experienced a drug related side effect, and dropped out. Since time to loss of therapeutic response was the outcome measure, deviation would go into favor of the placebo group. |
| Analyzed differently than to assigned group | PN | COMMENT: all patients were included in the analysis. |
| Overall performance bias | Low | |
| **Domain 3: Missing outcome data** | | |
| **Bias** | **Judgement** | **Support for judgment** |
| Availability outcome (nearly) all data | PY | COMMENT: since the primary endpoint is time to loss of therapeutic response, we stated 'probably yes'.  "all 121 participants having at least 1 dose, were included in the analysis." |
| Overall attrition bias | Low | |
| **Domain 4: Measurement of the outcome** | | |
| **Bias** | **Judgement** | **Support for judgment** |
| Outcome assessor’s awareness of received intervention | PN | COMMENT: for patient-reported outcomes, the outcome assessor is the study participant. Since the trial was double-blind we answered 'probably not'.  "Patients remained blinded at the point of transition between the two phases. Those patients randomized to placebo underwent a blinded taper during the first week of the double-blind phase to minimize changes in AEs. If the patient could not tolerate their optimized dose of pregabalin  CR (330–495 mg/day) or placebo, the patient underwent a 1 week taper and was discontinued from the study." |
| Overall outcome bias | Low |  |
| **Domain 5: Selective reporting** | | |
| Selection of outcome measurements | PN | Clinicaltrials.gov, 5-1-2011: first post primary endpoint: "Time to loss of therapeutic response based on pain response relative to baseline or patient discontinuation."  Paper: "primary endpoint: The primary efficacy endpoint was the time to loss of therapeutic response, defined as <30% pain reduction relative to the single-blind baseline or discontinuation owing to lack of efficacy or adverse event.” |
| Multiple analyses of data | PN | "The primary analysis compared the time from randomization to LTR during the double-blind phase using survival analysis techniques. Kaplan–Meier estimates of the survival curve were calculated, and the log-rank test was used to compare treatment groups. Four sensitivity analyses of the primary endpoint were performed to confirm the robustness of the primary (survival) analysis to different assumptions concerning the censoring mechanism (a patient who did not experience LTR is considered censored meaning that their time to LTR is known only to be greater than the day of their last observation." |
| Overall reporting bias | Low | |
| **Overall Bias** | Low | |

2013, Clauw

| **Domain 1: Randomization process** | | |
| --- | --- | --- |
| **Bias** | **Judgement** | **Support for judgment** |
| Random sequence generation | NI | "Randomization codes were generated and securely stored by Forest Research Institute, Inc (Jersey City, NJ, USA)." |
| Allocation concealment | Yes | "to dispense investigational medications, which were sealed and coded to maintain the double-blinding." |
| Baseline imbalances | No | "demographics and clinical characteristics were similar between treatment groups at randomization  (Table 1)." |
| Overall randomization bias | Yes | |
| **Domain 2: Deviations from intended interventions** | | |
| **Bias** | **Judgement** | **Support for judgment** |
| Participants’ awareness assigned intervention | NI | COMMENT: treatment emergent adverse events were in the placebo group 58% and in the treatment group 47%, thus most probably patients and caregivers could not guess to which group the patients were randomized to. Though no information is given regarding blinding of patients and caregivers. |
| Personnel’s’ awareness assigned intervention | NI |  |
| Deviations beyond expected practice | PN | COMMENT: percentage of treatment emergent adverse events were similar among groups. |
| Analyzed differently than to assigned group | PN | COMMENT: double-blind randomized and baseline characteristics similar. |
| Overall performance bias | Low | |
| **Domain 3: Missing outcome data** | | |
| **Bias** | **Judgement** | **Support for judgment** |
| Availability outcome (nearly) all data | PY | COMMENT: since the primary endpoint is time to loss of therapeutic response, we stated 'probably yes'.  "One patient who did not receive at least one dose of the study drug was excluded from safety and efficacy analyses."  COMMENT: one patient out of 150 was excluded from the analysis. |
| Overall attrition bias | Low | |
| **Domain 4: Measurement of the outcome** | | |
| **Bias** | **Judgement** | **Support for judgment** |
| Outcome assessor’s awareness of received intervention | PN | COMMENT: for patient-reported outcomes, the outcome assessor is the study participant. Since the trial was double-blind we answered 'probably not'.  "to dispense investigational medications, which were sealed and coded to maintain the double-blinding."  COMMENT: no tapering off is done, however treatment emergent adverse events were in the placebo group 58% and in the treatment group 47%, thus blinding seems to be maintained. |
| Overall outcome bias | Low |  |
| **Domain 5: Selective reporting** | | |
| Selection of outcome measurements | No | Clinicaltrial.gov, 16-11-2009: "Loss of therapeutic response (LTR), defined as a <30% reduction in Visual Analog Scale (VAS) pain score from pre-milnacipran exposure OR a worsening of fibromyalgia requiring, in the judgment of the Investigator, an alternative treatment 12 weeks randomized treatment period."  Paper: "The primary efficacy parameter was time to loss of therapeutic response (LTR), defined as time from baseline (randomization) to the first double-blind study visit in which a patient had <30%reduction in VAS pain from pre-milnacipran exposure or worsening of fibromyalgia requiring alternative treatment, as judged by the study’s principal investigator." |
| Multiple analyses of data | PN | "Kaplan-Meier estimates were used to analyze time to LTR ....., with comparisons between treatment groups analyzed using the log rank test." |
| Overall reporting bias | Low | |
| **Overall Bias** | Low | |

2012, Toth

| **Domain 1: Randomization process** | | |
| --- | --- | --- |
| **Bias** | **Judgement** | **Support for judgment** |
| Random sequence generation | Yes | ..."the number of pills received remained unchanged from the amount received on day 28 to avoid unmasking of allocation"  "Medication was blinded for placebo using capsules of identical size, color, taste, and smell. An electronic randomization system was used to randomize individual subjects without block randomization as developed by an outside coordinator. Randomization was concealed from subjects, clinical coordinator, and assessing physicians." |
| Allocation concealment | Yes |  |
| Baseline imbalances | No | "Baseline demographic and clinical characteristics were generally similar in the 2 randomized treatment cohorts, except for a greater proportion of women randomized to the nabilone group than in the placebo group (Table 1)." |
| Overall randomization bias | Low | |
| **Domain 2: Deviations from intended interventions** | | |
| **Bias** | **Judgement** | **Support for judgment** |
| Participants’ awareness assigned intervention | PN | "treatment-emergent adverse events were reported by 6/13 (46%) subjects receiving placebo and by 7/13 (54%) subjects receiving nabilone"  COMMENT: the first phase was single-blind. |
| Personnel’s’ awareness assigned intervention | NI |  |
| Deviations beyond expected practice | PN |  |
| Analyzed differently than to assigned group | PN | "All analyses were based on the intention-to-treat population." |
| Overall performance bias | Low | |
| **Domain 3: Missing outcome data** | | |
| **Bias** | **Judgement** | **Support for judgment** |
| Availability outcome (nearly) all data | PN | COMMENT: imputation method used is last observation carried forward, because when drop-out due to adverse events mostly addressed to the active treatment can inflate the results.  "All analyses were based on the intention-to-treat population." |
| Proportions missing data similar across groups | PN | COMMENT: >10% difference is present in drop-out due to adverse events. |
| Evidence of robustness of results | PY | "Sensitivity analyses performed on the primary efficacy end point showed similar statistically significant differences favoring tapentadol ER versus placebo for all evaluated imputation methods" |
| Overall attrition bias | Low | |
| **Domain 4: Measurement of the outcome** | | |
| **Bias** | **Judgement** | **Support for judgment** |
| Outcome assessor’s awareness of received intervention | PN | COMMENT: for patient-reported outcomes, the outcome assessor is the study participant. Since the trial was double-blind we answered 'probably not'.  "For subjects randomized to placebo, there was a 1-week blinded taper of either 0.5 mg daily or twice daily of nabilone regardless of dose achieved at day 28, followed by strict placebo use over the subsequent 4 weeks. However, the number of pills received remained unchanged from the  amount received on day 28 to avoid unmasking of allocation, with a mixture of nabilone and placebo provided to patients allocated to placebo."  "treatment-emergent adverse events were reported by 6/13 (46%) subjects receiving placebo and by 7/13 (54%) subjects receiving nabilone." |
| Overall outcome bias | Low |  |
| **Domain 5: Selective reporting** | | |
| Selection of outcome measurements | PN | Clinicaltrials.gov, 17-12-2009: "To evaluate the efficacy of nabilone compared to placebo in the treatment of diabetic neuropathy-associated peripheral neuropathic pain (DPN)."  Paper: "The mean difference in the average daily pain score was the primary efficacy variable, based on the mean of the last 7 entries in the daily pain diary during the fifth week of the double-blind phase, with comparison to the mean of scores obtained in the baseline week prior to single-blind nabilone use." |
| Multiple analyses of data | PN | "For the primary end point, nabilone adjuvant therapy was statistically more effective than placebo in improving pain at end point (MMRM analysis with LS means, P < 0.05)" |
| Overall reporting bias | Low | |
| **Overall Bias** | Low | |

2011, Steiner

| **Domain 1: Randomization process** | | |
| --- | --- | --- |
| **Bias** | **Judgement** | **Support for judgment** |
| Random sequence generation | NI | "randomized in a 1:1 ratio to BTDS 10 or matching placebo transdermal system (TDS)"  COMMENT: method of sequence generation was not reported. |
| Allocation concealment | NI |  |
| Baseline imbalances | No | "no meaningful differences with respect to the baseline characteristics and screening mean pain between the BTDS- and placebo TDS-treated groups (Table 2)." |
| Overall randomization bias | Some concerns | |
| **Domain 2: Deviations from intended interventions** | | |
| **Bias** | **Judgement** | **Support for judgment** |
| Participants’ awareness assigned intervention | NI | "Because symptoms of withdrawal could potentially occur in patients who were randomized to receive placebo TDS during the double-blind phase, all patients were provided with immediate release oxycodone for supplementary analgesia during the first six days following randomization."  "During the double-blind phase, the incidence of TEAEs in the randomized safety population was 55% for the BTDS treatment group and 52% for the placebo TDS treatment group." |
| Personnel’s’ awareness assigned intervention | PN |  |
| Deviations beyond expected practice | PN | COMMENT: because the treatment-related adverse events were similar between groups, and drop-out rates were similar: active group 34%, placebo group 30%, deviations in both groups are expected to be similar. |
| Analyzed differently than to assigned group | PN | COMMENT: because of random allocation, intention-to-treat analysis, and only 1 participant excluded from the intention-to-treat analysis out of 541 patients, we label this question as probably not. |
| Overall performance bias | Low | |
| **Domain 3: Missing outcome data** | | |
| **Bias** | **Judgement** | **Support for judgment** |
| Availability outcome (nearly) all data | PY | COMMENT: drop-outs were handled as follows: due to adverse events with screening observation carried forward and last observation carried forward due to other reasons.  "One patient who completed the study did not have a Week 12 pain score recorded (placebo group, thus 1 out of 284) This patient was not included in the analysis of a total patients of 541." |
| Overall attrition bias | Low | |
| **Domain 4: Measurement of the outcome** | | |
| **Bias** | **Judgement** | **Support for judgment** |
| Outcome assessor’s awareness of received intervention | PN | COMMENT: for patient-reported outcomes, the outcome assessor is the study participant. Since the trial was double-blind we answered 'probably not'.  "Because symptoms of withdrawal could potentially occur in patients who were randomized to receive placebo TDS during the double-blind phase, all patients were provided with immediate release oxycodone for supplementary analgesia during the first six days following randomization." |
| Overall outcome bias | Low |  |
| **Domain 5: Selective reporting** | | |
| Selection of outcome measurements | No | Clinicaltrials.gov, 22-06-2007: "The 'average pain over the last 24 hours' scores at week 12 of the double-blind phase."  Paper: "The primary efficacy outcome was the ‘‘average pain over the last 24 hours’’ score at Week 12 on an 11-point numerical rating scale." |
| Multiple analyses of data | PN | "A mixed-effect repeated-measure general linear model was used to analyze the primary efficacy variable. The model included patient as a random effect, treatment and time as fixed effects, and screening mean pain and pre-randomization mean pain as fixed covariates." |
| Overall reporting bias | Low | |
| **Overall Bias** | Some concerns | |

2011, Schwartz

| **Domain 1: Randomization process** | | |
| --- | --- | --- |
| **Bias** | **Judgement** | **Support for judgment** |
| Random sequence generation | Yes | "Randomization was implemented and the treatment schedule was maintained using an interactive voice response system (IVRS). Randomization numbers were assigned only at the time of randomization after phoning in to the IVRS. Patients and investigators were not provided with randomization codes. The IVRS assigned medication kits matching the randomly assigned treatment code for each patient." |
| Allocation concealment | Yes |  |
| Baseline imbalances | No | "Demographic and baseline characteristics were similar between groups in the double-blind phase (Table 1)." |
| Overall randomization bias | Low | |
| **Domain 2: Deviations from intended interventions** | | |
| **Bias** | **Judgement** | **Support for judgment** |
| Participants’ awareness assigned intervention | NI | "For patients who were randomized to receive placebo, blinded tapentadol ER 100 mg bid was given for 3 days before switching to placebo bid to alleviate possible withdrawal related to discontinuation."  "In the double-blind treatment period, the overall incidence of TEAEs was 70.9% (139/196) with tapentadol ER and 51.8% (100/193) with placebo." |
| Personnel’s’ awareness assigned intervention | PN |  |
| Deviations beyond expected practice | PN |  |
| Analyzed differently than to assigned group | PN | COMMENT: because of random allocation, intention-to-treat analysis, and only 6 patients excluded from the intention-to-treat analysis out of 395 patients, due to double randomization (n=3) or not receiving study medication, we label this question as probably not. |
| Overall performance bias | Low | |
| **Domain 3: Missing outcome data** | | |
| **Bias** | **Judgement** | **Support for judgment** |
| Availability outcome (nearly) all data | PN | COMMENT: of 395 patients, 6 were excluded from the intention-to-treat analysis:1.5%.  "these populations excluded three patients who were randomized twice (their first randomization was included) and three who did not receive study drug." |
| Proportions missing data similar across groups | PY | COMMENT: less than 10% difference between groups drop-outs due to adverse events were present. |
| Evidence of robustness of results | PY | "was repeated using the following methods: baseline observation carried forward (BOCF); worst observation carried forward; placebo mean imputation (mean of all available pain intensity scores for all patients who received placebo and completed treatment for a given day)"  "Statistically significant differences in favor of tapentadol ER versus placebo were observed using all imputation methods." |
| Overall attrition bias | Low | |
| **Domain 4: Measurement of the outcome** | | |
| **Bias** | **Judgement** | **Support for judgment** |
| Outcome assessor’s awareness of received intervention | PN | COMMENT: for patient-reported outcomes, the outcome assessor is the study participant. Since the trial was double-blind we answered 'probably not'.  "Patients and investigators were not provided with randomization codes." |
| Overall outcome bias | Low |  |
| **Domain 5: Selective reporting** | | |
| Selection of outcome measurements | No | Clinicaltrials.gov, 1-4-2007: "The primary outcome is the change from baseline at randomization in average pain intensity over the last week of the double-blind maintenance period at Week 12, as determined by twice-daily measurements on an 11-point numerical rating scale."  Paper: "The primary efficacy endpoint was the change from baseline in average pain intensity over the last week (week 12) of the double-blind maintenance period." |
| Multiple analyses of data | PN | "The primary efficacy variable was analyzed with an analysis of covariance (ANCOVA) model that included treatment, country, tapentadol ER dose category at the end of titration, and prior opioid-use status as factors and baseline average pain intensity score at randomization as a covariate. Treatment effects were estimated based on the difference in least-squares means of changes from baseline. Confidence intervals (CIs) and p-values were presented for tapentadol ER compared with placebo." |
| Overall reporting bias | Low | |
| **Overall Bias** | Low | |

2011, Gilron

| **Domain 1: Randomization process** | | |
| --- | --- | --- |
| **Bias** | **Judgement** | **Support for judgment** |
| Random sequence generation | Yes | "Medication was blinded by using capsules of identical size, color, taste, and smell for placebo and pregabalin. Double-blind medication was packaged and labeled with sequential randomization numbers according to the randomization schedule that was computer generated. A telerandomization system sequentially generated a randomization number and a unique patient identifier (center and 4-digit extension) to patients as they were determined to be eligible for study treatment." |
| Allocation concealment | Yes |  |
| Baseline imbalances | No | "The baseline characteristics of the pregabalin and placebo groups were similar, and overall the demographic characteristics of randomized patients were generally similar to all patient groups that entered the single-blind phase (Table 1)." |
| Overall randomization bias | Low | |
| **Domain 2: Deviations from intended interventions** | | |
| **Bias** | **Judgement** | **Support for judgment** |
| Participants’ awareness assigned intervention | PN | "During the double-blind, 5-week treatment period the overall incidence of adverse events was in the placebo group 55 of 77 (71.4%) and 48 of 80 (60.0%) in the pregabalin group"  COMMENT: the selection phase was single-blind. |
| Personnel’s’ awareness assigned intervention | NI |  |
| Deviations beyond expected practice | PN |  |
| Analyzed differently than to assigned group | PN | COMMENT: because of double-blind allocation, intention-to-treat analysis excluding only 3.2%, we labeled probably not. |
| Overall performance bias | Low | |
| **Domain 3: Missing outcome data** | | |
| **Bias** | **Judgement** | **Support for judgment** |
| Availability outcome (nearly) all data | PN | COMMENT: imputation method used is last observation carried forward, because when drop-out due to adverse events mostly addressed to the active treatment can inflate the results.  COMMENT: 3 out of 78 in the placebo group, and 2 out of 80 in the active group were excluded from the intention-to-treat analysis. This is 3.2%.  "these populations excluded three patients who were randomized twice (their first randomization was included) and three who did not receive study drug." |
| Proportions missing data similar across groups | PY | COMMENT: more drop-outs due to adverse events were present in the placebo group.  COMMENT: around the same amount of patients were excluded. Though reason for exclusion was not given. |
| Evidence of robustness of results | NI | COMMENT: no information is given about performing sensitivity analyses. |
| Overall attrition bias | Low | |
| **Domain 4: Measurement of the outcome** | | |
| **Bias** | **Judgement** | **Support for judgment** |
| Outcome assessor’s awareness of received intervention | PN | COMMENT: for patient-reported outcomes, the outcome assessor is the study participant. Since the trial was double-blind we answered 'probably not'.  "Among those randomized to placebo, the first week of the double-blind period was a washout period during which they were actually receiving pregabalin 150mg/d; patients then received placebo for the subsequent 4 weeks."  "Double-blind medication was packaged and labeled with sequential randomization numbers according to the randomization schedule that was computer generated" |
| Overall outcome bias | Low |  |
| **Domain 5: Selective reporting** | | |
| Selection of outcome measurements | No | Clinicaltrials.gov, 13-09-2005: "Evaluate the efficacy of pregabalin in relieving neuropathic pain in patients with peripheral neuropathic pain during the double-blind phase as measured by pain scores recorded in subject diaries."  Paper: "The primary efficacy variable was the mean pain score at the endpoint, based on the average of daily pain scores in the last week" |
| Multiple analyses of data | PN | "Continuous variables were analyzed using analysis of covariance model that included the terms for treatment group, center, and the respective value at randomization." |
| Overall reporting bias | Low | |
| **Overall Bias** | Low | |

2010, Katz

| **Domain 1: Randomization process** | | |
| --- | --- | --- |
| **Bias** | **Judgement** | **Support for judgment** |
| Random sequence generation | Yes | "The outpatient site contacted the Interactive Web Response System to receive a randomization number and treatment assignment (MS-sNT at the effective dose or placebo). Randomization was stratified by target joint (hip or knee), the final total daily dose of the titration period (≤80 mg, >80 mg), and site. Both drug and placebo were packaged so as to be blinded to the investigator, study clinic personnel, and patients." |
| Allocation concealment | Yes |  |
| Baseline imbalances | No | "Demographic characteristics of patients in the titration period and those subsequently randomized to treatment in the maintenance period were comparable (Table 2)." |
| Overall randomization bias | Low | |
| **Domain 2: Deviations from intended interventions** | | |
| **Bias** | **Judgement** | **Support for judgment** |
| Participants’ awareness assigned intervention | PN | "Patients randomized to the placebo group were tapered gradually in a blinded manner over 2 weeks using a double-dummy design."  COMMENT: drug related adverse events were in the active group 32.7%, and in the placebo group 26.0%. |
| Personnel’s’ awareness assigned intervention | PN |  |
| Analyzed differently than to assigned group | PN | COMMENT: because of double-blind allocation, only 1 out of 171 of the active group was excluded from intention-to-treat analysis, we labeled this question as probably not. |
| Overall performance bias | Low | |
| **Domain 3: Missing outcome data** | | |
| **Bias** | **Judgement** | **Support for judgment** |
| Availability outcome (nearly) all data | PY | COMMENT: drop-outs due to adverse events and opioid withdrawal symptoms were handled with screening observation carried forward, and all other reasons with last observation carried forward.  COMMENT: only 1 out of 171 of the active group and no one of the placebo group was excluded from intention-to-treat analysis. Total analyzed patients: 343. |
| Overall attrition bias | Low | |
| **Domain 4: Measurement of the outcome** | | |
| **Bias** | **Judgement** | **Support for judgment** |
| Outcome assessor’s awareness of received intervention | PN | COMMENT: for patient-reported outcomes, the outcome assessor is the study participant. Since the trial was double-blind we answered 'probably not'.  "Patients randomized to the placebo group were tapered gradually in a blinded manner over 2 weeks using a double-dummy design."  COMMENT: drug related adverse events were in the active group 32.7 %, and in the placebo group 26.0 %. |
| Overall outcome bias | Low |  |
| **Domain 5: Selective reporting** | | |
| Selection of outcome measurements | No | Clinicaltrials.gov, 10-01-2007: "Evaluate the efficacy of Kadian NT (BID) compared with placebo as measured by mean change in diary Brief Pain Index score of average pain (daily scores of average pain averaged over 7 days) from randomization to 12 weeks following randomization." |
| Multiple analyses of data | PN | "Comparisons between the MS-sNT and placebo groups for the primary efficacy measure were made by an analysis of covariance (ANCOVA) with treatment as a categorical factor and the randomization baseline score as covariate." |
| Overall reporting bias | Low | |
| **Overall Bias** | Low | |

2010, Hale

| **Domain 1: Randomization process** | | |
| --- | --- | --- |
| **Bias** | **Judgement** | **Support for judgment** |
| Random sequence generation | Yes | "This randomization schedule was generated by ICON Clinical Research."  "All personnel involved with the double-blind phase of the study, including the sponsor and relevant investigational staff, were blinded to the medication codes. At the time of randomization, an IVRS was called to dispense properly blinded study medication by associating the packaging identification number (PIN) on the study medication label with the patient’s randomization number. After randomization, the central laboratory blinded hydromorphone results to help protect the overall blind, even though the patients may or may not have been using the rescue medication provided." |
| Allocation concealment | Yes |  |
| Baseline imbalances | No | "The baseline demographics and clinical characteristics for the ITT population were similar between the two treatment groups (Table 1)." |
| Overall randomization bias | Low | |
| **Domain 2: Deviations from intended interventions** | | |
| **Bias** | **Judgement** | **Support for judgment** |
| Participants’ awareness assigned intervention | PN | "All personnel involved with the double-blind phase of the study, including the sponsor and relevant investigational staff, were blinded to the medication codes."  "A total of 36 (26.9%) hydromorphone ER-treated patients and 43 (32.1%) placebo-treated patients experienced at least one AE that was considered related to study medication." |
| Personnel’s’ awareness assigned intervention | PN |  |
| Analyzed differently than to assigned group | PN | COMMENT: because it was a double-blind allocation, an intention-to-treat analysis and 1 patient in each group excluded out of a total patients of 266, we labeled this question with probably not. |
| Overall performance bias | Low | |
| **Domain 3: Missing outcome data** | | |
| **Bias** | **Judgement** | **Support for judgment** |
| Availability outcome (nearly) all data | PY | COMMENT: drop-outs due to adverse events were handled with screening observation carried forward, opioid withdrawal symptoms in placebo group with baseline observation carried forward, and all other reasons with last observation carried forward.  "Two patients (one in each treatment group) were not included in the predefined ITT population: one patient in the hydromorphone ER group did not receive study medication, and one patient in the placebo group had no baseline diary NRS scores before randomization."  COMMENT: 2 out of 266 patients were not included in the intention-to-treat analysis. |
| Overall attrition bias | Low | |
| **Domain 4: Measurement of the outcome** | | |
| **Bias** | **Judgement** | **Support for judgment** |
| Outcome assessor’s awareness of received intervention | PN | COMMENT: for patient-reported outcomes, the outcome assessor is the study participant. Since the trial was double-blind we answered 'probably not'.  "All personnel involved with the double-blind phase of the study, including the sponsor and relevant investigational staff, were blinded to the medication codes."  "A total of 36 (26.9%) hydromorphone ER-treated patients and 43 (32.1%) placebo-treated patients experienced at least one AE that was considered related to study medication." |
| Overall outcome bias | Low |  |
| **Domain 5: Selective reporting** | | |
| Selection of outcome measurements | No | Clinicaltrials.gov, 23-10-2007: "The primary efficacy variable is the mean change from baseline to week 12 average pain intensity of double-blind treatment phase based on the weekly pain intensity scores obtained from patient diary entry, as compared to placebo."  Paper: "The primary efficacy assessment was the mean change from baseline to week 12 or final visit of the double-blind phase in weekly pain intensity NRS scores (0=no pain; 10=worst possible pain) recorded by the patients daily in a paper diary." |
| Multiple analyses of data | PN | "For the primary efficacy outcome, the two treatment groups were compared for change in pain intensity at week 12 or final visit by using a Cochran–Mantel–Haenszel (CMH) 2-test after adjusting for the baseline pain score using ranks." |
| Overall reporting bias | Low | |
| **Overall Bias** | Low | |

2010, Baron

| **Domain 1: Randomization process** | | |
| --- | --- | --- |
| **Bias** | **Judgement** | **Support for judgment** |
| Random sequence generation | Yes | “A central Internet/telephone randomization system (IMPALA) was used to assign patient identification numbers, to assign all study medication, and to randomize patients to double-blind treatment.”  "Once a patient was randomized to a treatment at the start of the double-blind treatment phase, the investigator, the patient, and the staff involved in the conduct or management of the study were blinded to the patient’s treatment assignment." |
| Allocation concealment | Yes |  |
| Baseline imbalances | No | "Demographic and baseline characteristics were comparable across treatment groups (Table 1)." |
| Overall randomization bias | Low | |
| **Domain 2: Deviations from intended interventions** | | |
| **Bias** | **Judgement** | **Support for judgment** |
| Participants’ awareness assigned intervention | PN | "Once a patient was randomized to a treatment at the start of the double-blind treatment phase, the investigator, the patient, and the staff involved in the conduct or management of the study were blinded to the patient’s treatment assignment."  COMMENT: the selection phase was single-blind. |
| Personnel’s’ awareness assigned intervention | PN |  |
| Analyzed differently than to assigned group | PN | COMMENT: because of double-blind allocation, IMPALA analysis, and failure of showing superiority of pregabalin over placebo, the chance participants were wrongly analyzed is very small. |
| Overall performance bias | Low | |
| **Domain 3: Missing outcome data** | | |
| **Bias** | **Judgement** | **Support for judgment** |
| Availability outcome (nearly) all data | PY | COMMENT: since the primary endpoint is time to loss of therapeutic response, we stated 'probably yes'.  COMMENT: 1 out of 110 randomized to active was excluded because not treated. In placebo group all were included in the intention-to-treat analysis. |
| Overall attrition bias | Low | |
| **Domain 4: Measurement of the outcome** | | |
| **Bias** | **Judgement** | **Support for judgment** |
| Outcome assessor’s awareness of received intervention | PN | COMMENT: for patient-reported outcomes, the outcome assessor is the study participant. Since the trial was double-blind we answered 'probably not'.  "Once a patient was randomized to a treatment at the start of the double-blind treatment phase, the investigator, the patient, and the staff involved in the conduct or management of the study were blinded to the patient’s treatment assignment." |
| Overall outcome bias | Low |  |
| **Domain 5: Selective reporting** | | |
| Selection of outcome measurements | PN | Clinicaltrials.gov, 08-09-2005: "Pain measurement"  Paper: "The primary efficacy measure was the time to loss of therapeutic response (LOR) or discontinuation from the study for any reason during the double-blind phase. LOR was defined as >1-point increase in pain compared with weekly mean pain score at randomization or the use of any rescue medication for pain."  COMMENT: the primary endpoint is in Clinicaltrials.gov very broadly defined, although in the paper there is a power calculation given on loss of therapeutic response and the study was negative. |
| Multiple analyses of data | PN | "Time-to-event curves for pregabalin and placebo were plotted using Kaplan–Meier methods and compared using a Cox proportional hazard model that included factors to control for pooled study center, prior back surgery, and baseline pain severity." |
| Overall reporting bias | Low | |
| **Overall Bias** | Low | |

2008, Crofford

| **Domain 1: Randomization process** | | |
| --- | --- | --- |
| **Bias** | **Judgement** | **Support for judgment** |
| Random sequence generation | PY | "A telerandomization system randomized responders to either matching placebo or optimal OL dosage of pregabalin (1:1). Patients randomized to placebo were tapered off pregabalin treatment during the first week of DB in a blinded manner." |
| Allocation concealment | PY |  |
| Baseline imbalances | No | "Baseline FM-related characteristics were also similar between the placebo and pregabalin treatment groups and across the pregabalin dosage groups." |
| Overall randomization bias | Low | |
| **Domain 2: Deviations from intended interventions** | | |
| **Bias** | **Judgement** | **Support for judgment** |
| Participants’ awareness assigned intervention | NI | "Of 566 patients randomized into the DB treatment phase, 129 (45%), 37 (59%), 46 (63%), and 89 (62%) in the placebo, 300, 450, and 600 mg/d pregabalin groups, respectively, experienced a treatment-emergent AE" |
| Personnel’s’ awareness assigned intervention | PN |  |
| Deviations beyond expected practice | PN |  |
| Analyzed differently than to assigned group | PN | COMMENT: due to double-blind allocation, intention-to-treat analysis, we assume that participants were all analyzed in the correct group, thus labeled this question as probably not. |
| Overall performance bias | Low | |
| **Domain 3: Missing outcome data** | | |
| **Bias** | **Judgement** | **Support for judgment** |
| Availability outcome (nearly) all data | PY | COMMENT: since the primary endpoint is time to loss of therapeutic response, we stated 'probably yes'.  "The primary and secondary efficacy analyses were performed on the intent-to-treat population (ITT), defined as all patients who were randomized at the end of the OL treatment phase.  Patients who completed the 6-month DB phase or who withdrew prior to LTR were censored (i.e., were considered to not have had an LTR) at their last observation. ITT patients with no post-baseline observations were included but were censored at Day 1." |
| Overall attrition bias | Low | |
| **Domain 4: Measurement of the outcome** | | |
| **Bias** | **Judgement** | **Support for judgment** |
| Outcome assessor’s awareness of received intervention | PN | COMMENT: for patient-reported outcomes, the outcome assessor is the study participant. Since the trial was double-blind we answered 'probably not'.  "Patients randomized to placebo were tapered off pregabalin treatment during the first week of DB in a blinded manner."  "Of 566 patients randomized into the DB treatment phase, 129 (45%), 37 (59%), 46 (63%), and 89 (62%) in the placebo, 300, 450, and 600 mg/d pregabalin groups, respectively, experienced a treatment-emergent AE" |
| Overall outcome bias | Low |  |
| **Domain 5: Selective reporting** | | |
| Selection of outcome measurements | PY | Clinicaltrials.gov, 07-09-2005: "To evaluate the efficacy of pregabalin (BID) compared with placebo in assessing the durability of effect for the treatment of pain associated with fibromyalgia among patients who initially respond to open-label pregabalin using Pain Visual Analog Scale."  Paper: "The primary efficacy parameter was time to LTR, measured in days, and defined as having either <30% reduction in pain VAS score relative to OL baseline value at 2 consecutive visits of the DB phase (the first of the two visits defined the time to LTR; the second was for confirmation) or worsening, in the judgment of the investigator, of FM symptoms necessitating alternate treatment."  COMMENT: the definition of the stated primary endpoint in Clinicaltrials.gov is broadened in the paper with the judgment of the investigator. |
| Multiple analyses of data | PN | "The primary statistical analysis was performed using a Kaplan–Meier Survival Analysis with time to LTR as the response of interest. Kaplan–Meier estimates of the time to LTR were compared using the log-rank statistic obtained from SAS Proc Lifetest." |
| Overall reporting bias | High | |
| **Overall Bias** | High | |

2007, Katz

| **Domain 1: Randomization process** | | |
| --- | --- | --- |
| **Bias** | **Judgement** | **Support for judgment** |
| Random sequence generation | NI | "A randomization code was generated by the sponsor to ensure the appropriate number of patients was allocated to each treatment group at random. Patient medication kits were assigned unique 4-digit treatment numbers according to the randomization code."  COMMENT: method of sequence generation was not reported. |
| Allocation concealment | Yes | COMMENT: The sponsor allocated participants. |
| Baseline imbalances | No | "The randomized groups were similar in respect to age, race, gender, and etiology of CLBP (Table 1)." |
| Overall randomization bias | Some concerns | |
| **Domain 2: Deviations from intended interventions** | | |
| **Bias** | **Judgement** | **Support for judgment** |
| Participants’ awareness assigned intervention | PN | "Because the different strengths of oxymorphone ER were distinguishable, the tablets of oxymorphone ER and placebo were over-encapsulated with gelatin to ensure that patients, investigator/study staff, and sponsor staff remained blind to study treatment."  COMMENT: table 4 shows adverse events in active group 58.1% and in placebo group 44.0%. |
| Personnel’s’ awareness assigned intervention | PN |  |
| Analyzed differently than to assigned group | PN | COMMENT: because it was a double-blind allocation, an intention-to-treat analysis and all 205 patients were included, we labeled this question with not. |
| Overall performance bias | Low | |
| **Domain 3: Missing outcome data** | | |
| **Bias** | **Judgement** | **Support for judgment** |
| Availability outcome (nearly) all data | PY | COMMENT: drop-outs due to adverse events were handled with screening observation carried forward, opioid withdrawal symptoms in placebo group with baseline observation carried forward, and all other reasons with last observation carried forward.  "Efficacy results were reported for the all-treated patient population."  COMMENT: all 205 patients were included in the intention-to-treat analysis. |
| Overall attrition bias | Low | |
| **Domain 4: Measurement of the outcome** | | |
| **Bias** | **Judgement** | **Support for judgment** |
| Outcome assessor’s awareness of received intervention | PN | COMMENT: for patient-reported outcomes, the outcome assessor is the study participant. Since the trial was double-blind we answered 'probably not'.  "Because the different strengths of oxymorphone ER were distinguishable, the tablets of oxymorphone ER and placebo were over-encapsulated with gelatin to ensure that patients, investigator/study staff, and sponsor staff remained blind to study treatment." |
| Overall outcome bias | Low |  |
| **Domain 5: Selective reporting** | | |
| Selection of outcome measurements | No | Clinicaltrials.gov, 22-09-2005: "Change in pain intensity from baseline (pre-randomization) to last assessment."  Paper: "The primary endpoint was the change from baseline (at randomization) to final visit in the average pain intensity in the past 24 h." |
| Multiple analyses of data | PN | "For the change in pain intensity from baseline to final visit, an analysis of covariance (ANCOVA) was performed with treatment and center as effects and screening and baseline average pain intensity as covariates. The least squares (LS) mean and 95% confidence interval of the treatment difference were calculated." |
| Overall reporting bias | Low | |
| **Overall Bias** | Some concerns | |

2007, Hale

| **Domain 1: Randomization process** | | |
| --- | --- | --- |
| **Bias** | **Judgement** | **Support for judgment** |
| Random sequence generation | NI | "All stabilized patients were randomized to either continue their fixed dose of OPANA ER or receive placebo."  COMMENT: method of sequence generation was not reported. |
| Allocation concealment | NI |  |
| Baseline imbalances | PN | "Of the 250 patients who were enrolled and received open-label treatment with OPANA ER, the majority were white (88%), the mean (standard deviation [SD]) age was 49.1 (12.9) years, and slightly more patients were women (Table 2)." |
| Overall randomization bias | Some concerns | |
| **Domain 2: Deviations from intended interventions** | | |
| **Bias** | **Judgement** | **Support for judgment** |
| Participants’ awareness assigned intervention | NI |  |
| Personnel’s’ awareness assigned intervention | NI |  |
| Deviations beyond expected practice | PN |  |
| Analyzed differently than to assigned group | PN | COMMENT: because it was a double-blind allocation, an intention-to-treat analysis and only 5 out of 147 patients were excluded from the intention-to-treat analysis, we labeled this question with probably no. |
| Overall performance bias | Low | |
| **Domain 3: Missing outcome data** | | |
| **Bias** | **Judgement** | **Support for judgment** |
| Availability outcome (nearly) all data | PY | COMMENT: drop-outs due to adverse events were handled with screening observation carried forward, opioid withdrawal symptoms in placebo group with baseline observation carried forward, and all other reasons with last observation carried forward.  COMMENT: 5 patients not signing the Health Insurance Portability and Accountability Act form were removed from the efficacy analysis before unblinding. This is 5 out of 147 : 3.4%. |
| Overall attrition bias | Low | |
| **Domain 4: Measurement of the outcome** | | |
| **Bias** | **Judgement** | **Support for judgment** |
| Outcome assessor’s awareness of received intervention | PN | “randomized to the placebo group, supplemental OPANA 5-mg tablets were available as needed (but not more frequently than every 4 to 6 hours) during the first 4 days of the treatment period and then restricted to 2 doses per day thereafter (maximum, 5 mg OPANA twice daily)." |
| Overall outcome bias | Low |  |
| **Domain 5: Selective reporting** | | |
| Selection of outcome measurements | No | Clinicaltrials.gov 23-09-2005: "Change in pain intensity from baseline (pre-randomization) to last assessment."  Paper: "The primary efficacy end point was the change in average pain intensity (VAS) from baseline (before randomization) to final study visit (at the end of double-blind treatment or at early discontinuation)." |
| Multiple analyses of data | PN | "For the primary end point, change in average pain intensity from baseline to final visit, analysis of covariance (ANCOVA) was performed with treatment and center as effects and screening and baseline pain as covariates." |
| Overall reporting bias | Low | |
| **Overall Bias** | Some concerns | |

1999, Caldwell

| **Domain 1: Randomization process** | | |
| --- | --- | --- |
| **Bias** | **Judgement** | **Support for judgment** |
| Random sequence generation | NI | "For the primary end point, change in average pain intensity from baseline to final visit, analysis of covariance (ANCOVA) was performed with treatment and center as effects and screening and baseline pain as covariates." |
| Allocation concealment | Yes |  |
| Baseline imbalances | PN | COMMENT: Table 1 shows patient characteristics, which seem to be similar between groups. |
| Overall randomization bias | Low | |
| **Domain 2: Deviations from intended interventions** | | |
| **Bias** | **Judgement** | **Support for judgment** |
| Participants’ awareness assigned intervention | PN | "The double dummy technique was used to blind the study medications for differences in appearance and dosing frequency." |
| Personnel’s’ awareness assigned intervention | PN |  |
| Analyzed differently than to assigned group | No | COMMENT: because it was a double-blind allocation, and intention-to-treat analysis all participants, we labeled this question with no. |
| Overall performance bias | Low | |
| **Domain 3: Missing outcome data** | | |
| **Bias** | **Judgement** | **Support for judgment** |
| Availability outcome (nearly) all data | PN | COMMENT: imputation method used is last observation carried forward, because when drop-out due to adverse events mostly addressed to the active treatment can inflate the results.  "All 107 patients randomized to double-blind treatment were included in the statistical analysis (intent-to-treat)." |
| Proportions missing data similar across groups | PY | COMMENT: the difference % drop-outs due to adverse events from the total drop-outs between groups is <10%, therefore we labeled 'probably yes'. |
| Evidence of robustness of results | NI | COMMENT: no information on sensitivity analyses is given. |
| Overall attrition bias | Low | |
| **Domain 4: Measurement of the outcome** | | |
| **Bias** | **Judgement** | **Support for judgment** |
| Outcome assessor’s awareness of received intervention | PN | COMMENT: For patient-reported outcomes, the outcome assessor is the study participant. Since the trial was double-blind we answered 'probably not'.  "There was no washout period between the titration and double-blind phases."  COMMENT: adverse events were about the same percentage in placebo and 2 both active groups. |
| Overall outcome bias | Low |  |
| **Domain 5: Selective reporting** | | |
| Selection of outcome measurements | NI | COMMENT: this study was not found in clinicaltrials.gov, nor a protocol was available. |
| Multiple analyses of data | PN | "Efficacy variables were analyzed using analysis of covariance (ANCOVA); global pain intensity was the primary efficacy variable. Fisher's least significant difference test was used to test for differences between active treatments, and Dunnett's test for differences between placebo and active treatments." |
| Overall reporting bias | Some concerns | |
| **Overall Bias** | Some concerns | |
